# Supplementary material
Source: PubMed Central journal article supplement (PMC5817215)

- 1 **Table S1.** Analysis of virulence determinants in the viral PB2, PB1-F2, PB1, PA, M2, NS1,  
 2 and NS2 proteins in the currently 10 Egyptian H9N2 viruses isolated from poultry.

| <b>Protein</b> | <b>Site</b> | <b>Virulent</b> | <b>A virulent</b> | <b>Egyptian H9N2<br/>(2013-2015)</b> |
|----------------|-------------|-----------------|-------------------|--------------------------------------|
| <b>PB2</b>     | 627         | K               | E                 | V(8), E (2)                          |
|                | 147         | L               | M                 | I                                    |
|                | 250         | G               | V                 | V                                    |
|                | 504         | V               | I                 | V                                    |
|                | 701         | N               | D                 | D                                    |
|                | 404         | L               | F                 | F                                    |
|                | 591         | K               | Q                 | K(2), Q(8)                           |
| <b>PB1</b>     | 317         | I               | M/V               | I(8),M(2)                            |
| <b>PB1-f2</b>  | 66          | S               | N                 | S(7), N(3)                           |
| <b>PA</b>      | 127         | V               | I                 | V                                    |
|                | 672         | L               | F                 | L                                    |
|                | 550         | L               | I                 | L                                    |
| <b>M2</b>      | 64          | S/A/F           | P                 | S                                    |
|                | 69          | P               | L                 | P                                    |
| <b>NS1</b>     | 42          | S               | A/P               | S                                    |
|                | 92          | E               | D                 | D                                    |
|                | 103         | L               | F                 | F                                    |
|                | 106         | I               | M                 | M                                    |
|                | 189         | N               | D/G               | D                                    |
| <b>NS2</b>     | 31          | I               | M                 | M                                    |
|                | 56          | Y               | H/L               | H                                    |

3

4

5

6

7 **Table S2.** Analysis of host range genetic determinants in the PB2, PB1-F2, PB1, PA, NP,  
8 M1, M2, NS1, and NS2 proteins in H9N2 viruses isolated from poultry in Egypt. The avian-  
9 or mammalian-preference markers are shown.

| <b>Viral protein</b> | <b>aa site</b> | <b>Avian preference</b> | <b>Mammalian preference</b> | <b>Egyptian H9N2 (2013-2015)</b> |
|----------------------|----------------|-------------------------|-----------------------------|----------------------------------|
| <b>PB2</b>           | 44             | A                       | S                           | A                                |
|                      | 64             | M                       | T                           | M                                |
|                      | 81             | T                       | M                           | T                                |
|                      | 199            | A                       | S                           | A                                |
|                      | 318            | K                       | R                           | K (7), R (3)                     |
|                      | 627            | E                       | K                           | V (8), E (2)                     |
|                      | 661            | A                       | T                           | A                                |
|                      | 701            | D                       | N                           | D                                |
|                      | 702            | K                       | R                           | K                                |
| <b>PB1</b>           | 68             | T                       | I                           | T                                |
|                      | 73             | K                       | R                           | K (9), E (1)                     |
|                      | 76             | V                       | A                           | V (7), A (3)                     |
|                      | 79             | R                       | Q                           | R (9), Q(1)                      |
|                      | 82             | L                       | S                           | S (8), W (2)                     |
| <b>PB1-F2</b>        | 13             | L                       | P                           | P                                |
|                      | 336            | V                       | I                           | V                                |
|                      | 375            | N                       | S                           | N                                |
| <b>PA</b>            | 28             | P                       | L                           | P                                |
|                      | 55             | D                       | N                           | D                                |
|                      | 57             | R                       | Q                           | R                                |
|                      | 100            | V                       | A                           | V (9), A (1)                     |
|                      | 133            | E                       | G                           | E                                |
|                      | 225            | S                       | C                           | S                                |
|                      | 241            | C                       | Y                           | C                                |
|                      | 268            | L                       | I                           | L                                |
|                      | 312            | K                       | R                           | K                                |
|                      | 356            | K                       | R                           | K                                |
|                      | 382            | E                       | D                           | E (8), D (2)                     |
|                      | 400            | Q/T/S                   | L                           | S                                |
|                      | 404            | A                       | S                           | A                                |
|                      | 409            | S                       | N                           | S                                |
|                      | 552            | T                       | S                           | T                                |
|                      | 556            | Q                       | R                           | Q                                |
| 615                  | K              | L                       | K (9), R (1)                |                                  |
| <b>NP</b>            | 31             | R                       | K                           | R                                |

|            |     |   |     |              |
|------------|-----|---|-----|--------------|
|            | 33  | V | I   | V            |
|            | 34  | D | N   | G            |
|            | 61  | I | L   | I (8),T (2)  |
|            | 100 | R | V   | R            |
|            | 109 | I | V   | I            |
|            | 127 | E | D   | E            |
|            | 136 | L | M   | L            |
|            | 214 | R | K   | K (8), R (2) |
|            | 283 | L | P   | L            |
|            | 293 | R | K   | R            |
|            | 305 | R | K   | R            |
|            | 313 | F | Y   | F            |
|            | 357 | Q | K   | Q            |
|            | 372 | E | D   | E            |
|            | 375 | D | G/E | D            |
|            | 398 | K | Q   | Q            |
|            | 422 | R | K   | R            |
|            | 442 | T | A   | T            |
|            | 455 | D | E   | D            |
| <b>M1</b>  | 15  | V | I   | I            |
|            | 115 | V | I   | V            |
|            | 121 | T | A   | T            |
|            | 137 | T | A   | T            |
| <b>M2</b>  | 11  | T | I   | T            |
|            | 16  | E | G/D | G            |
|            | 20  | S | N   | S            |
|            | 28  | I | I/V | V (8), I (2) |
|            | 57  | Y | H   | Y            |
|            | 55  | L | F   | F            |
|            | 86  | V | A   | V            |
| <b>NS1</b> | 227 | E | K/R | K (8), E (2) |

10

11

12

13 **Table S3:** Hemagglutination inhibition assay titers of monoclonal antibodies against different  
 14 Egyptian H9N2 isolates

15

| Virus                     | Monoclonal Antibodies |         |          |         |
|---------------------------|-----------------------|---------|----------|---------|
|                           | Y280                  | G9      | 1073     | G1      |
|                           | 18G4                  | (G9-25) | (1073-9) | (G1-26) |
| A/chicken/Egypt/S4456B/11 | 800                   | 51200   | 400      | 25600   |
| A/chicken/Egypt/D4692A/12 | 200                   | 204800  | 800      | 25600   |
| A/chicken/Egypt/D4905B/12 | 200                   | 204800  | 6400     | 12800   |
| A/chicken/Egypt/S5018C/12 | 800                   | 25600   | 800      | 12800   |
| A/chicken/Egypt/S5018D/12 | 1600                  | 204800  | 12800    | 25600   |
| A/chicken/Egypt/S5440E/12 | 800                   | 102400  | 800      | 12800   |
| A/chicken/Egypt/S5442C/12 | 400                   | 102400  | 800      | 12800   |
| A/chicken/Egypt/S5442E/12 | 800                   | 102400  | 3200     | 25600   |
| A/chicken/Egypt/D5490B/12 | 400                   | 204800  | 12800    | 25600   |
| A/chicken/Egypt/S7022D/13 | >100                  | 204800  | 12800    | 26500   |
| A/chicken/Egypt/S7025E/13 | >100                  | 51200   | >100     | 12800   |
| A/chicken/Egypt/D7099/13  | 100                   | 204800  | 800      | 25600   |
| A/chicken/Egypt/D7100/13  | 100                   | 204800  | 400      | 12800   |
| A/chicken/Egypt/D7108E/13 | 400                   | 204800  | 25600    | 25600   |
| A/chicken/Egypt/S7404/13  | 400                   | 204800  | 3200     | 25600   |
| A/chicken/Egypt/D7436C/13 | 100                   | 204800  | 6400     | 12800   |
| A/chicken/Egypt/S9288A/13 | 400                   | 25600   | >100     | 6400    |
| A/chicken/Egypt/D9326C/14 | 800                   | 51200   | 200      | 12800   |
| A/chicken/Egypt/S9348B/14 | 800                   | 51200   | 400      | 12800   |
| A/chicken/Egypt/D9377/14  | 800                   | 51200   | 200      | 12800   |
| A/chicken/Egypt/Q9394E/14 | 800                   | 51200   | >100     | 12800   |
| A/chicken/Egypt/F9516B/14 | 800                   | 51200   | >100     | 6400    |
| A/chicken/Egypt/D9570B/14 | 800                   | 25600   | 800      | 12800   |
| A/chicken/Egypt/D9817E/14 | 800                   | 12800   | >100     | 6400    |
| A/quail/Egypt/D9842/14    | 400                   | 25600   | 400      | 200     |
| A/quail/Egypt/D10093/14   | 400                   | 400     | 1600     | 200     |
| A/quail/Egypt/D10105/14   | 100                   | 100     | 800      | 100     |

|                                   |      |       |      |       |
|-----------------------------------|------|-------|------|-------|
| <b>A/quail/Egypt/D10106/14</b>    | 200  | 200   | 800  | 20016 |
| <b>A/chicken/Egypt/F10285D/14</b> | 1600 | 51200 | 400  | 12800 |
| <b>A/chicken/Egypt/S10312C/14</b> | 800  | 25600 | 800  | 12800 |
| <b>A/pigeon/ Egypt/S10408B/14</b> | 800  | 51200 | >100 | 12800 |
| <b>A/pigeon/ Egypt/S10409A/14</b> | 800  | 51200 | >100 | 12800 |
| <b>A/chicken/Egypt/Q10429E/14</b> | 200  | 12800 | 400  | 3200  |
| <b>A/chicken/Egypt/F10534C/15</b> | 200  | 12800 | 800  | 3200  |
| <b>A/chicken/Egypt/N10963 /15</b> | 400  | 25600 | 800  | 12800 |
| <b>A/chicken/Egypt/N10975/15</b>  | 200  | 12800 | 800  | 6400  |
| <b>A/chicken/Egypt/F10993B/15</b> | 1600 | 25600 | 800  | 12800 |

**Table S4 : Hemagglutination inhibition assay titers of polyclonal antibodies against different Egyptian H9N2 isolates**

| <b>Antibodies against</b>  | <b>A/chicken/Egypt/<br/>D9570B/2014</b> | <b>A/turkey/Israel/1<br/>567/04</b> | <b>A/chicken/Egypt/<br/>D9817E/2014</b> | <b>A/pigeon/<br/>Egypt/S10408B/20<br/>14</b> | <b>A/Hong<br/>Kong/1073/99</b> | <b>A/chicken/Egypt/<br/>S4456B/2011</b> | <b>A/quail/leban/27<br/>2/2010</b> | <b>A/Bangladesh/10<br/>994/2011</b> |
|----------------------------|-----------------------------------------|-------------------------------------|-----------------------------------------|----------------------------------------------|--------------------------------|-----------------------------------------|------------------------------------|-------------------------------------|
| A/chicken/Egypt/S4456B/11  | 4096                                    | 4096                                | 4096                                    | 4096                                         | 256                            | 4096                                    | 4096                               | ND                                  |
| A/chicken/Egypt/D4692A/12  | 2048                                    | 2048                                | 2048                                    | 4096                                         | 128                            | 4096                                    | 1024                               | 256                                 |
| A/chicken/Egypt/D4905B/12  | 4096                                    | 4096                                | 4096                                    | 4096                                         | 32                             | 4096                                    | 4096                               | ND                                  |
| A/chicken/Egypt/S5018D/12  | 512                                     | 512                                 | 512                                     | 1024                                         | 64                             | 1024                                    | 256                                | 256                                 |
| A/chicken/Egypt/S7022D/13  | 4096                                    | 4096                                | 4096                                    | 4096                                         | 256                            | 4096                                    | 1024                               | ND                                  |
| A/chicken/Egypt/S7025E/13  | 4096                                    | 4096                                | 4096                                    | 4096                                         | 64                             | 2048                                    | 512                                | ND                                  |
| A/chicken/Egypt/D7099/13   | 4096                                    | 4096                                | 4096                                    | 4096                                         | 256                            | 4096                                    | 512                                | 256                                 |
| A/chicken/Egypt/D7100/13   | 2048                                    | 2048                                | 2048                                    | 2048                                         | 256                            | 1024                                    | 512                                | 256                                 |
| A/chicken/Egypt/D7108/13   | 2048                                    | 1024                                | 1024                                    | 2048                                         | 64                             | 1024                                    | 256                                | 128                                 |
| A/chicken/Egypt/S7404/13   | 1024                                    | 1024                                | 1024                                    | 1024                                         | 128                            | 1024                                    | 512                                | 256                                 |
| A/chicken/Egypt/D7436C/13  | 1024                                    | 1024                                | 1024                                    | 2048                                         | 128                            | 2048                                    | 256                                | 128                                 |
| A/chicken/Egypt/S9288A/13  | 1024                                    | 1024                                | 1024                                    | 1024                                         | 32                             | 256                                     | 32                                 | 2048                                |
| A/chicken/Egypt/D9326C/14  | 1024                                    | 1024                                | 2048                                    | 2048                                         | 64                             | 4096                                    | 256                                | 2048                                |
| A/chicken/Egypt/S9348B/14  | 4096                                    | 4096                                | 4096                                    | 4096                                         | 256                            | 4096                                    | 4096                               | 4096                                |
| A/chicken/Egypt/D9377/14   | 2048                                    | 2048                                | 4096                                    | 4096                                         | 64                             | 2048                                    | 8                                  | 2048                                |
| A/chicken/Egypt/Q9394E/14  | 1024                                    | 512                                 | 1024                                    | 1024                                         | 32                             | 1024                                    | 128                                | 2048                                |
| A/chicken/Egypt/F9516B/14  | 512                                     | 512                                 | 512                                     | 1024                                         | 32                             | 256                                     | 256                                | 2048                                |
| A/chicken/Egypt/D9570B/14  | 1024                                    | 512                                 | 2048                                    | 1024                                         | 32                             | 4096                                    | 256                                | 256                                 |
| A/chicken/Egypt/S9655B/14  | 4096                                    | 4096                                | 4096                                    | 4096                                         | 256                            | 4096                                    | 4096                               | 2048                                |
| A/chicken/Egypt/D9817E/14  | 4069                                    | 2048                                | 4096                                    | 4096                                         | 64                             | 2048                                    | 256                                | 1024                                |
| A/quail/Egypt/D9842/14     | 256                                     | 512                                 | 512                                     | 1024                                         | 32                             | 1024                                    | 256                                | ND                                  |
| A/quail/Egypt/D10093/14    | 32                                      | 128                                 | 64                                      | 128                                          | 8                              | 32                                      | 64                                 | 512                                 |
| A/quail/Egypt/D10105/14    | 16                                      | 32                                  | 16                                      | 64                                           | 32                             | 8                                       | 16                                 | 256                                 |
| A/quail/Egypt/D10106/14    | 32                                      | 128                                 | 128                                     | 256                                          | 32                             | 64                                      | 128                                | 256                                 |
| A/chicken/Egypt/F10285D/14 | 4096                                    | 4096                                | 4096                                    | 4069                                         | 256                            | 4096                                    | 2048                               | 2048                                |
| A/chicken/Egypt/S10312C/14 | 512                                     | 512                                 | 512                                     | 1024                                         | 16                             | 1024                                    | 256                                | 256                                 |

|                                   |      |      |      |      |     |      |      |      |
|-----------------------------------|------|------|------|------|-----|------|------|------|
| <b>A/pigeon/ Egypt/S10408B/14</b> | 2048 | 512  | 1024 | 2048 | 32  | 2048 | 256  | 2048 |
| <b>A/pigeon/ Egypt/S10409A/14</b> | 4096 | 2048 | 4096 | 4096 | 128 | 4096 | 4096 | 2048 |
| <b>A/chicken/Egypt/Q10429E/14</b> | 256  | 256  | 512  | 512  | 8   | 512  | 64   | 512  |
| <b>A/chicken/Egypt/S10490/15</b>  | 4096 | 2048 | 4096 | 4096 | 32  | 1024 | 128  | ND   |
| <b>A/chicken/Egypt/F10534C/15</b> | 128  | 1024 | 1024 | 2048 | 16  | 1024 | 256  | 2048 |
| <b>A/chicken/Egypt/N10963 /15</b> | 4096 | 2048 | 4096 | 4069 | 128 | 2048 | 512  | ND   |
| <b>A/chicken/Egypt/N10975/15</b>  | 2048 | 1024 | 1024 | 2048 | 128 | 2048 | 1024 | ND   |
| <b>A/chicken/Egypt/F10993B/15</b> | 4096 | 4096 | 4096 | 4096 | 128 | 4096 | 1024 | ND   |

18 **Table S5:** Summarized profile of Egyptian AIV H9N2 isolates used in this study

| <b>H9N2 isolate</b>                | <b>Governorate</b> | <b>Host</b> | <b>Health status</b> | <b>Sequence</b> |    | <b>Collection Site</b> | <b>Collection Date</b> |
|------------------------------------|--------------------|-------------|----------------------|-----------------|----|------------------------|------------------------|
| <b>A/chicken/Egypt/S9288A/2013</b> | Sharqia            | Chicken     | Healthy              | HA              | NA | Farm                   | 22/12/2013             |
| <b>A/chicken/Egypt/D9326C/2013</b> | Dakahlia           | Chicken     | Healthy              | HA              | NA | Farm                   | 28/12/2013             |
| <b>A/chicken/Egypt/S9348B/2014</b> | Sharqia            | Chicken     | Healthy              | HA              | NA | House                  | 4/1/2014               |
| <b>A/chicken/Egypt/D9377/2014</b>  | Dakahlia           | Chicken     | Healthy              | HA              | NA | Market                 | 15/1/2014              |
| <b>A/chicken/Egypt/Q9394E/2014</b> | Qalyubia           | Chicken     | Dead                 | HA              | NA | Farm                   | 18/1/2014              |
| <b>A/chicken/Egypt/F9516B/2014</b> | Faiyum             | Chicken     | Sick                 | Full genome     |    | Farm                   | 15//1/2014             |
| <b>A/chicken/Egypt/D9570B/2014</b> | Dakahlia           | Chicken     | Healthy              | HA              | NA | Farm                   | 11/2/2014              |
| <b>A/chicken/Egypt/S9645/2014</b>  | Sharqia            | Chicken     | Healthy              | HA              | NA | Market                 | 17/2/2014              |
| <b>A/chicken/Egypt/S9652E/2014</b> | Sharqia            | Chicken     | Healthy              | HA              | NA | House                  | 17/2/2014              |
| <b>A/chicken/Egypt/S9668D/2014</b> | Sharqia            | Chicken     | Healthy              | HA              | NA | Farm                   | 17/2/2014              |
| <b>A/chicken/Egypt/C9742/2014</b>  | Cairo              | Chicken     | Healthy              | HA              | NA | Market                 | 4/3/2014               |
| <b>A/ duck/Egypt /C9787 /2014</b>  | Cairo              | Duck        | Healthy              | Full genome     |    | Market                 | 5/3/2014               |
| <b>A/chicken/Egypt/D9817E/2014</b> | Dakahlia           | Chicken     | Healthy              | HA              | NA | Farm                   | 11/3/2014              |
| <b>A/quail/ Egypt /D9842/2014</b>  | Dakahlia           | Quail       | Healthy              | Full genome     |    | Market                 | 22/4/2014              |
| <b>A/chicken/Egypt/F9883C/2014</b> | Faiyum             | Chicken     | Sick                 | HA              | NA | Farm                   | 23/4/2014              |
| <b>A/quail/Egypt/D10093/2014</b>   | Dakahlia           | Quail       | Healthy              | Full genome     |    | Market                 | 19/8/2014              |
| <b>A/quail/Egypt/D10105/2014</b>   | Dakahlia           | Quail       | Healthy              | Full genome     |    | Market                 | 19/8/2014              |
| <b>A/ quail /Egypt/D10106/2014</b> | Dakahlia           | Quail       | Healthy              | Full genome     |    | Market                 | 19/8/2014              |
| <b>A/chicken/F10285D/2014</b>      | Faiyum             | Chicken     | Dead                 | HA              | NA | Farm                   | 26/10/2014             |
| <b>A/chicken/S10312C/2014</b>      | Sharqia            | Chicken     | Sick                 | HA              | NA | Farm                   | 14/11/2014             |



|                                     |          |         |         |             |    |        |            |
|-------------------------------------|----------|---------|---------|-------------|----|--------|------------|
| <b>A/pigeon/ Egypt/S10408B/2014</b> | Sharqia  | Pigeon  | Healthy | Full genome |    | House  | 9/12/2014  |
| <b>A/pigeon/Egypt/S10409A/2014</b>  | Sharqia  | Pigeon  | Healthy | Full genome |    | House  | 9/12/2014  |
| <b>A/chicken/Egypt/Q10429E/2014</b> | Qalyubia | Chicken | Dead    | Full genome |    | Farm   | 13/12/2014 |
| <b>A/chicken/Egypt/S10489C/2015</b> | Sharqia  | Chicken | Healthy | HA          | NA | Farm   | 5/1/2015   |
| <b>A/chicken/Egypt/S10490/2015</b>  | Sharqia  | Chicken | Healthy | HA          | NA | Market | 5/1/2015   |
| <b>A/chicken/Egypt/F10528A/2015</b> | Faiyum   | Chicken | Sick    | HA          | NA | Farm   | 19/1/2015  |
| <b>A/chicken/Egypt/F10533A/2015</b> | Faiyum   | Chicken | Sick    | HA          | NA | Farm   | 19/1/2015  |
| <b>A/chicken/Egypt/F10533D/2015</b> | Faiyum   | Chicken | Sick    | HA          | NA | Farm   | 19/1/2015  |
| <b>A/chicken/Egypt/F10534C/2015</b> | Faiyum   | Chicken | Sick    | HA          | NA | Farm   | 19/1/2015  |
| <b>A/chicken/Egypt/D10549D/2015</b> | Dakahlia | Chicken | Sick    | HA          | NA | Farm   | 27/1/2015  |
| <b>A/chicken/Egypt/D10560/2015</b>  | Dakahlia | Chicken | Healthy | HA          | NA | Market | 27/1/2015  |
| <b>A/chicken/Egypt/D10561/2015</b>  | Dakahlia | Chicken | Healthy | HA          | NA | Market | 27/1/2015  |
| <b>A/chicken/Egypt/D10562/2015</b>  | Dakahlia | Chicken | Healthy | HA          | NA | Market | 27/1/2015  |
| <b>A/chicken/Egypt/D10564/2015</b>  | Dakahlia | Chicken | Healthy | HA          | NA | Market | 27/1/2015  |
| <b>A/chicken/Egypt/D10566B/2015</b> | Dakahlia | Chicken | Sick    | HA          | NA | Farm   | 27/1/2015  |
| <b>A/chicken/Egypt/A10588/2015</b>  | Asyut    | Chicken | Healthy | HA          | NA | Market | 9/2/2015   |
| <b>A/chicken/Egypt/A10593D/2015</b> | Asyut    | Chicken | Dead    | HA          | NA | House  | 9/2/2015   |
| <b>A/chicken/Egypt/S10597A/2015</b> | Sharqia  | Chicken | Sick    | HA          | NA | Farm   | 15/2/2015  |
| <b>A/chicken/Egypt/S10598E/2015</b> | Sharqia  | Chicken | Sick    | HA          | NA | Farm   | 15/2/2015  |
| <b>A/chicken/Egypt/Q10649C/2015</b> | Qalyubia | Chicken | Dead    | HA          | NA | Farm   | 18/2/2015  |
| <b>A/chicken/Egypt/Q10660B/2015</b> | Qalyubia | Chicken | Dead    | HA          | NA | Farm   | 21/2/2015  |
| <b>A/chicken/Egypt/D10685D/2015</b> | Dakahlia | Chicken | Healthy | HA          | NA | Farm   | 26/2/2015  |

|                                      |          |         |         |             |    |          |           |
|--------------------------------------|----------|---------|---------|-------------|----|----------|-----------|
| <b>A/chicken/Egypt/D10700/2015</b>   | Dakahlia | Chicken | Healthy | HA          | NA | Market   | 26/2/2015 |
| <b>A/chicken/Egypt/D10704/2015</b>   | Dakahlia | Chicken | Healthy | HA          | NA | Market   | 26/2/2015 |
| <b>A/chicken/Egypt/D10705/2015</b>   | Dakahlia | Chicken | Healthy | HA          | NA | Market   | 26/2/2015 |
| <b>A/chicken/Egypt/D10706E/2015</b>  | Dakahlia | Chicken | Sick    | HA          | NA | Farm     | 26/2/2015 |
| <b>A/chicken/Egypt/D10707B/2015</b>  | Dakahlia | Chicken | Sick    | HA          | NA | Farm     | 26/2/2015 |
| <b>A/chicken/Egypt/D10788/2015</b>   | Dakahlia | Chicken | Healthy | HA          | NA | Market   | 21/3/2015 |
| <b>A/chicken/Egypt/D10789/2015</b>   | Dakahlia | Chicken | Healthy | HA          | NA | Market   | 21/3/2015 |
| <b>A/chicken/Egypt/D10798D/2015</b>  | Dakahlia | Chicken | Healthy | HA          | NA | Farm     | 21/3/2015 |
| <b>A/chicken/Egypt/D10799A/2015</b>  | Dakahlia | Chicken | Healthy | HA          | NA | Farm     | 21/3/2015 |
| <b>A/chicken/Egypt/D10802E/2015</b>  | Dakahlia | Chicken | Healthy | HA          | NA | Farm     | 28/3/2015 |
| <b>A/chicken/Egypt/S10916B/2015</b>  | Sharqia  | Chicken | Healthy | HA          | NA | Farm     | 6/4/2015  |
| <b>A/chicken/Egypt/D10939E/2015</b>  | Dakahlia | Chicken | Healthy | HA          | NA | Farm     | 20/4/2015 |
| <b>A/chicken/Egypt/D10945E/2015</b>  | Dakahlia | Chicken | Healthy | HA          | NA | Farm     | 20/4/2015 |
| <b>A/chicken/Egypt/N10957A/2015</b>  | Minya    | Chicken | Healthy | HA          | NA | Farm     | 24/4/2015 |
| <b>A/chicken/Egypt/N10963 /2015</b>  | Minya    | Chicken | Healthy | HA          | NA | Abattoir | 24/4/2015 |
| <b>A/chicken/Egypt/N10975/2015</b>   | Minya    | Chicken | Healthy | HA          | NA | Market   | 24/4/2015 |
| <b>A/chicken/Egypt/F10993B/2015*</b> | Faiyum   | Chicken | Dead    | Full genome |    | Farm     | 28/4/2015 |

19 \*This isolate was obtained from vaccinated poultry by H9N2 vaccine (Ceva).

20

21

22

23 **Table S6:** Summarized Egyptian AIV H9N2 genes released in this study with their accession  
 24 numbers in GenBank

25

| Isolate                      | PB2      | PB1      | PA       | HA       | NP       | NA       | M        | NS       |
|------------------------------|----------|----------|----------|----------|----------|----------|----------|----------|
| A/chicken/Egypt/S9288A/2013  |          |          |          | KX000736 |          | KX000773 |          |          |
| A/chicken/Egypt/D9326C/2013  |          |          |          | KX000797 |          | KX000868 |          |          |
| A/chicken/Egypt/S9348B/2014  |          |          |          | KX000748 |          | KX000803 |          |          |
| A/chicken/Egypt/D9377/2014   |          |          |          | KX000845 |          | KX000851 |          |          |
| A/chicken/Egypt/Q9394E/2014  |          |          |          | KX000735 |          | KX000799 |          |          |
| A/chicken/Egypt/F9516B/2014  | KX000870 | KX000762 | KX000776 | KX000718 | KX000765 | KX000831 | KX000835 | KX000709 |
| A/chicken/Egypt/D9570B/2014  |          |          |          | KX000817 |          | KX000786 |          |          |
| A/chicken/Egypt/S9645/2014   |          |          |          | KX000758 |          | KX000746 |          |          |
| A/chicken/Egypt/S9652E/2014  |          |          |          | KX000823 |          | KX000768 |          |          |
| A/chicken/Egypt/S9668D/2014  |          |          |          | KX000754 |          | KX000829 |          |          |
| A/chicken/Egypt/C9742/2014   |          |          |          | KX000864 |          | KX000795 |          |          |
| A/ duck/Egypt /C9787 /2014   | KX000804 | KX000841 | KX000755 | KX000751 | KX000767 | KX000738 | KX000728 | KX000747 |
| A/chicken/Egypt/D9817E/2014  |          |          |          | KX000871 |          | KX000840 |          |          |
| A/quail/ Egypt /D9842/2014   | KX000720 | KX000869 | KX000740 | KX000857 | KX000733 | KX000858 | KX000771 | KX000725 |
| A/chicken/Egypt/F9883C/2014  |          |          |          | KX000860 |          | KX000879 |          |          |
| A/quail/Egypt/D10093/2014    | KX000731 | KX000772 | KX000730 | KX000790 | KX000818 | KX000872 | KX000833 | KX000724 |
| A/quail/Egypt/D10105/2014    | KX000784 | KX000711 | KX000800 | KX000710 | KX000809 | KX000852 | KX000819 | KX000780 |
| A/ quail /Egypt/D10106/2014  | KX000827 | KX000826 | KX000737 | KX000865 | KX000810 | KX000722 | KX000834 | KX000705 |
| A/chicken/F10285D/2014       |          |          |          | KX000713 |          | KX000850 |          |          |
| A/chicken/S10312C/2014       |          |          |          | KX000760 |          | KX000832 |          |          |
| A/pigeon/ Egypt/S10408B/2014 | KX000876 | KX000837 | KX000855 | KX000789 | KX000866 | KX000811 | KX000779 | KX000859 |
| A/pigeon/Egypt/S10409A/2014  | KX000764 | KX000729 | KX000723 | KX000715 | KX000806 | KX000778 | KX000828 | KX000785 |
| A/chicken/Egypt/Q10429E/2014 | KX000752 | KX000877 | KX000874 | KX000830 | KX000744 | KX000856 | KX000714 | KX000849 |
| A/chicken/Egypt/S10489C/2015 |          |          |          | KX000794 |          | KX000757 |          |          |
| A/chicken/Egypt/S10490/2015  |          |          |          | KT216664 |          | KX000842 |          |          |
| A/chicken/Egypt/F10528A/2015 |          |          |          | KX000801 |          | KX000753 |          |          |
| A/chicken/Egypt/F10533A/2015 |          |          |          | KX000712 |          | KX000808 |          |          |
| A/chicken/Egypt/F10533D/2015 |          |          |          | KX000745 |          | KX000848 |          |          |
| A/chicken/Egypt/F10534C/2015 |          |          |          | KX000763 |          | KX000721 |          |          |
| A/chicken/Egypt/D10549D/2015 |          |          |          | KX000863 |          | KX000774 |          |          |
| A/chicken/Egypt/D10560/2015  |          |          |          | KX000741 |          | KX000854 |          |          |
| A/chicken/Egypt/D10561/2015  |          |          |          | KX000844 |          | KX000875 |          |          |
| A/chicken/Egypt/D10562/2015  |          |          |          | KX000770 |          | KX000796 |          |          |
| A/chicken/Egypt/D10564/2015  |          |          |          | KX000822 |          | KX000873 |          |          |

|                              |          |          |          |          |          |          |          |          |
|------------------------------|----------|----------|----------|----------|----------|----------|----------|----------|
| A/chicken/Egypt/D10566B/2015 |          |          |          | KX000878 |          | KX000816 |          |          |
| A/chicken/Egypt/A10588/2015  |          |          |          | KX000814 |          | KX000759 |          |          |
| A/chicken/Egypt/A10593D/2015 |          |          |          | KX000846 |          | KX000717 |          |          |
| A/chicken/Egypt/S10597A/2015 |          |          |          | KX000708 |          | KX000727 |          |          |
| A/chicken/Egypt/S10598E/2015 |          |          |          | KX000792 |          | KX000812 |          |          |
| A/chicken/Egypt/Q10649C/2015 |          |          |          | KX000732 |          | KX000787 |          |          |
| A/chicken/Egypt/Q10660B/2015 |          |          |          | KX000775 |          | KX000761 |          |          |
| A/chicken/Egypt/D10685D/2015 |          |          |          | KX000766 |          | KX000726 |          |          |
| A/chicken/Egypt/D10700/2015  |          |          |          | KX000756 |          | KX000734 |          |          |
| A/chicken/Egypt/D10704/2015  |          |          |          | KX000821 |          | KX000798 |          |          |
| A/chicken/Egypt/D10705/2015  |          |          |          | KX000861 |          | KX000742 |          |          |
| A/chicken/Egypt/D10706E/2015 |          |          |          | KX000815 |          | KX000820 |          |          |
| A/chicken/Egypt/D10707B/2015 |          |          |          | KX000836 |          | KX000862 |          |          |
| A/chicken/Egypt/D10788/2015  |          |          |          | KX000805 |          | KX000813 |          |          |
| A/chicken/Egypt/D10789/2015  |          |          |          | KX000739 |          | KX000824 |          |          |
| A/chicken/Egypt/D10798D/2015 |          |          |          | KX000716 |          | KX000782 |          |          |
| A/chicken/Egypt/D10799A/2015 |          |          |          | KX000777 |          | KX000719 |          |          |
| A/chicken/Egypt/D10802E/2015 |          |          |          | KT216663 |          | KT216662 |          |          |
| A/chicken/Egypt/S10916B/2015 |          |          |          | KX000853 |          | KX000807 |          |          |
| A/chicken/Egypt/D10939E/2015 |          |          |          | KX000750 |          | KX000839 |          |          |
| A/chicken/Egypt/D10945E/2015 |          |          |          | KX000793 |          | KX000707 |          |          |
| A/chicken/Egypt/N10957A/2015 |          |          |          | KX000781 |          | KX000788 |          |          |
| A/chicken/Egypt/N10963 /2015 |          |          |          | KX000838 |          | KX000802 |          |          |
| A/chicken/Egypt/N10975/2015  |          |          |          | KX000743 |          | KX000749 |          |          |
| A/chicken/Egypt/F10993B/2015 | KX000706 | KX000769 | KX000825 | KX000791 | KX000867 | KX000843 | KX000847 | KX000783 |

27 **Figure S1.** Antiviral sensitivity assays for Egyptian H9N2 viruses to amantadine with IC<sub>50</sub> (a) and  
 28 oseltamivir (b) were determined in MDCK cells by plaque reduction assay  
 29

30 **Fig. S1a**

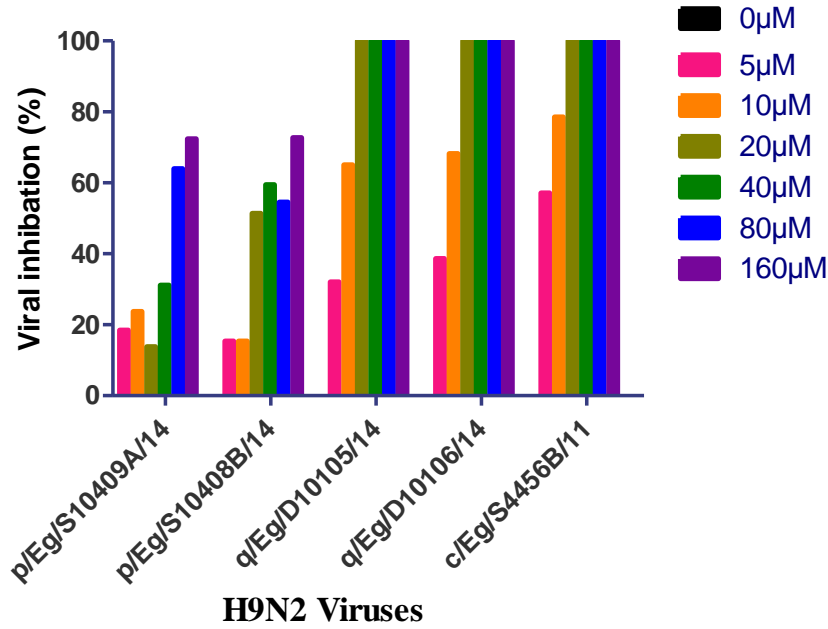

| H9N2 Virus                   | IC <sub>50</sub> (μm of amantadine) |
|------------------------------|-------------------------------------|
| A/pigeon/Egypt/S10409A/2014  | 110                                 |
| A/pigeon/ Egypt/S10408B/2014 | 70                                  |
| A/quail/Egypt/D10105/2014    | 8.2                                 |
| A/quail/Egypt/D10106/2014    | 7                                   |
| A/chicken/Egypt/S4456B/2011  | 1.4                                 |

49 **Fig. S1b**

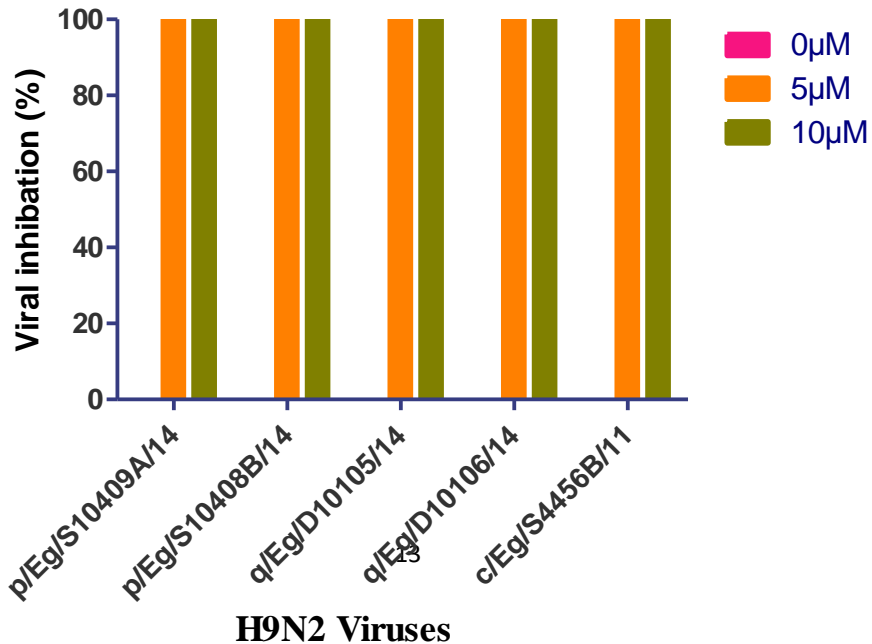

Supplement: jgv-98-548-s001.pdf [file jgv-98-548-s001.pdf]
